1 **Original Article**

2 **Systematic Evaluation of Adiposity Indices as Predictors of Hypertension Risk in Children**  
3 **and Adolescents**

4 **Short title:** Adiposity Indices in Pediatric Hypertension

5 **Authors:** Bowen Zhu (phD)<sup>\*1,2,3</sup>, Shumin Zhan (M.S.)<sup>\*1,2</sup>, Hui Shi (M.S.)<sup>\*4</sup>, Xingyun Wang(phD)<sup>2</sup>,  
6 Jingwen Yue (M.S.)<sup>3</sup>, Jianfang Gao (M.S.)<sup>2</sup>, Tongshuai Wang (phD)<sup>2,3</sup>, Rui Wang (phD)<sup>2</sup>, Xirong  
7 Guo (MD, phD)<sup>2#</sup>, Junfen Fu (MD, phD)<sup>1#</sup>

8 *1 Department of Endocrinology, Children's Hospital, Zhejiang University School of Medicine,*  
9 *National Clinical Research Center for Child Health, Hangzhou, 310051, China.*

10 *2 Hongqiao International Institute of Medicine, Tongren Hospital, Shanghai Jiao Tong University*  
11 *School of Medicine, No.1111, XianXia Road, Shanghai 200336, China.*

12 *3 Department of Clinical Research Center, Tongren Hospital, Shanghai Jiao Tong University School*  
13 *of Medicine, No.1111, XianXia Road, Shanghai 200336, China.*

14 *4 Xinhua Hospital, Shanghai Jiao Tong University School of Medicine, 1665 Kongjiang Road,*  
15 *200092, Shanghai, China.*

16 <sup>\*</sup>Bowen Zhu, Shumin Zhan and Hui Shi equally contributed to the manuscript.

17 **# Corresponding author:**

18 Junfen Fu, MD, PhD, Department of Endocrinology, The Children' s Hospital of Zhejiang  
19 University School of Medicine, National Clinical Research Center for Child Health, 3333

**NOTE: This preprint reports new research that has not been certified by peer review and should not be used to guide clinical practice.**

20 Binsheng Road, Hangzhou 310052, China. Email: [fjf68@zju.edu.cn](mailto:fjf68@zju.edu.cn); ORCID:  
21 0000-0001-6405-1251.

22 Xirong Guo, MD, PhD, Professor of Pedology, Hongqiao International Institute of Medicine,  
23 Tongren Hospital, Shanghai Jiao Tong University School of Medicine, No.1111, XianXia Road,  
24 Shanghai 200336, China. Tel/Fax: 021-52039999; Email: [xrguo@shsmu.edu.cn](mailto:xrguo@shsmu.edu.cn)

25

## 26 **Abstract**

27 **Objective** To systemically examine the concomitant impact of adiposity indices on  
28 hypertension in children and adolescents.

29 **Methods** A community-based cohort study by China Health and Nutrition Survey (2009-2011)  
30 included 262 children and adolescents aged 7-17. Anthropometric and lipid profiles were  
31 analyzed for hypertension risk using logistic and cross-lagged models.

32 **Results** Of the 227 participants (mean age, 16.5 [2.3] years), 147 (53.9%) were boys. Over a  
33 two-year period, 26.4% developed hypertension, 5.3% had elevated systolic blood pressure  
34 (SBP), and 25.6% had elevated diastolic blood pressure (DBP). After adjusting for covariates,  
35 higher body mass index (BMI), waist circumference (WC), hip circumference (HC), triceps  
36 skinfold thickness (TST), and body roundness index (BRI) were associated with increased  
37 hypertension risk. Incorporating these measures into a BP-based model improved the AUC for  
38 hypertension prediction from 0.551 (95% CI: 0.463, 0.640) to 0.670 (95% CI: 0.592, 0.748). A  
39 longitudinal relationship were observed between these adiposity indices and hypertension  
40 symptoms.

41 **Conclusions** The study suggests anthropometry parameters are superior to blood lipid  
42 indicators in predicting the occurrence of hypertension in children. Abdominal obesity, as  
43 indicated by WC, HC, and BRI, accounts for a significant portion of the risk for hypertension,  
44 particularly in children aged 7 to 12 years.

45 **Keywords:** Adiposity Indices, Pediatric Hypertension, Children and adolescents, Cross-lagged  
46 Model

## 48 **1.Introduction**

49 Hypertension affects about 4% of children and 11% of adolescents globally [1]. The early  
50 identification and proper intervention of high blood pressure or hypertension during childhood  
51 are extremely crucial because these conditions are related to cardiovascular morbidity (left  
52 ventricular hypertrophy and high carotid intima-media thickness) and mortality in adulthood  
53 and are commonly associated with obesity [2-4]. A comprehensive analysis of 2033 studies  
54 spanning 154 countries has revealed a significant prevalence of overweight and obesity among  
55 children and adolescents[5]. The pooled estimates indicate that 8.5% are overweight and 14.8%  
56 are obese, which translates to roughly one in every five young individuals facing the challenge of  
57 excess weight. China's rapid economic progress has brought about major lifestyle and societal  
58 transformations, resulting in a surge in metabolic disorders. This trend is likely to have a  
59 substantial effect on the cardiovascular disease (CVD) burden in the country. The number of  
60 children aged 5 to 19 years with obesity is predicted to rise to 254 million by 2030 [6]. It is  
61 believed that obesity-related primary hypertension has contributed to the rise in hypertension  
62 prevalence, which has doubled from 1% to 4% over the past three decades[7-8].

63 Enhancing our comprehension of the anthropometric and biochemical indicators of adiposity  
64 profiles in the context of hypertension is essential for the prevention and management of this  
65 condition in children and adolescents. In a cohort study of youths, a high normal body weight  
66 above the 60th percentile of BMI for age was associated with an increased risk of hypertension  
67 [9]. The suggested thresholds of 0.50 and 0.46 for two distinct pediatric groups have  
68 demonstrated robust predictive capabilities for identifying individuals with two or more  
69 cardiometabolic risk factors in populations from six countries [10]. Furthermore, innovative  
70 anthropometric indices such as the Body Shape Index (BSI), Body Roundness Index (BRI),  
71 Conicity Index (CI), and Visceral Fat Index (VFI) have been introduced to more accurately  
72 pinpoint subcutaneous and visceral fat distribution. A meta-analysis with 21108 children and  
73 adolescents confirmed that original ABSI and modified ABSI do not perform as well as  
74 traditional anthropometric indicators, such as BMI and WC. BMI continues to be the most  
75 effective indicator for screening high blood pressure (HBP) in pediatric populations[11]. Rui  
76 Chen et al. reported that WHtR and BRI can be recommended to identify hypertension,  
77 dyslipidemia, abdominal obesity, and clustered cardio-metabolic risk factors (CMRFs) in  
78 7-17-year-old teenagers [12]. However, the majority of studies have been conducted with adult  
79 populations, and the interplay and individual impact of biochemical measures, anthropometric  
80 data, and composite metrics on hypertension remains to be fully elucidated. Furthermore, there  
81 is a scarcity of data that can differentiate between the hypertension risk in childhood associated  
82 with initial obesity-related metrics and the predictive capacity. In this study, we aimed to  
83 systemically investigate the temporal and bidirectional relationship between anthropometric  
84 and biochemistry measures of obesity and hypertension symptoms and further explore the

85 prediction ability of obesity-related measures for hypertension status using a large cohort.

## 86 **2. Materials and Methods**

### 87 **2.1 Study cohorts**

88 This survey encompassed children and adolescents aged 7 to 17 years, with two follow-up visits  
89 conducted between 2009 and 2011. Valid blood pressure (BP) data, comprising three repeated  
90 readings, were obtained. Participants with missing BP values during the follow-up period were  
91 excluded from the analysis. The data was sourced from the China Health and Nutrition Survey  
92 (CHNS), an ongoing, open cohort study. The CHNS is a comprehensive, nationwide, prospective  
93 cohort study that includes a representative sample of the Chinese population. Its primary  
94 objective is to assess the impact of health, nutrition, and family planning policies and programs  
95 implemented by both national and local governments. Further details regarding the study  
96 design and data collection methodologies of the CHNS have been documented in prior  
97 publications [13]. Blood samples were collected in the 2009 year, and data information on  
98 biochemical indicators was obtained. Since blood samples were collected in 2009 year, a total of  
99 768 participants with blood biomarkers information were collected in 2009. After excluding  
100 those who had 3-day high protein intake (n=17), elevated SBP or DBP (defined as age- and  
101 sex-specific 90th percentile, n=221), glucose above 7.0 mmol/L or HbA1c above 6.5% (n=8),  
102 BMI above 35 kg/m<sup>2</sup> (n=1), missing data of systolic BP or diastolic BP (n=133), 388 participants  
103 were included in the formal analysis. After that, a total of 161 participants were excluded as  
104 they had lost visits during the follow-up duration (***Supplementary Figure 1***). Demographic and  
105 behavioral characteristics of participants included in the final analysis (n=227) were compared

106 with those of excluded participants (*Supplementary Table 1*). All data and samples were  
107 collected after written informed consent was obtained from parents or caregivers for children  
108 and adolescents aged 7 to 17 years. The CHNS was granted approval by the Institutional Review  
109 Board at the University of North Carolina at Chapel Hill, as well as by the local Institutional  
110 Review Board of Ethics Committee.

## 111 **2.2 Data collection**

112 A standardized structured questionnaire was administered by trained health staff to collect  
113 socio-demographic variables (in 2009) including age, gender, urban-rural residence,  
114 soft/sugared fruit drinks, total protein intake, total fat intake, total carbohydrate intake, and  
115 total energy intake. Physical examinations of waist circumference (WC), hip circumference (HC),  
116 height, weight, triceps skinfold thickness (TST), upper arm circumference (UAC), and BP were  
117 performed by trained clinical staff. All individuals maintained a regular life pattern for at least  
118 three days before blood sample collection and 12 ml of blood was collected (in three 4 ml tubes)  
119 on an empty stomach. Biomarker data collected in CHNS 2009 involves the release of 26 fasting  
120 blood measures on individuals aged 7 and older [14]. The estimated glomerular filtration rate  
121 (eGFR) was calculated using the Schwartz formula [15]. The individuals were categorized into  
122 groups, namely, residence, urban, and rural. Individual dietary intake for 3 consecutive days was  
123 determined for every household member. This step has been achieved by asking individuals  
124 each day to report all food consumed away from home on a 24-hour recall basis, and the same  
125 daily interview has been used to collect at-home individual consumption. Soft/sugared fruit

126 drinks information was assessed by the question including “Drink soft/sugared fruit drinks?” or  
127 “How often drink soft/sugared fruit drinks?”.

### 128 **2.3 Adiposity Indices Measures**

129 Adiposity indices measures included body mass index (BMI), waist circumference (WC), hip  
130 circumference (HC), triceps skinfold thickness (TST), waist to hip circumference ratio (WHR),  
131 upper arm circumference (UAC), triglyceride (TG), high-density lipoprotein cholesterol (HDL-c),  
132 blood glucose, serum uric acid (SUA), conicity index (CI), body shape index (BSI), visceral fat  
133 index (VFI), body roundness index (BRI). BMI was calculated as  $\text{weight}(\text{kg})/\text{height}^2(\text{m}^2)$  and was  
134 converted into age and gender-specific BMI percentiles [16]. Abdominal obesity was defined as  
135 waist circumference age- and sex-specific 90th percentile, determined by the cut-off points of  
136 standards for Chinese children and adolescents [17]. Waist to height ratio (WHR) was calculated  
137 as  $\text{waist circumference}(\text{cm})/\text{height}(\text{cm})$ . The calculation of the novel anthropometric indices is  
138 described below, with the relevant reference cited at the end of each formula:

139  $CI = WC/0.109 * (Wt/Ht)^{1/2}$  [18]

140  $BSI = WC * Wt^{-2/3} * Ht^{-5/6}$  [19]

141  $VFI = WC / [39.68 + 1.88 * BMI * TG / 1.03] * [1.31 / HDL-C]$  (for male),

142  $VFI = WC / (36.58 + 1.89 * BMI) * (TG / 0.81) * (1.52 / HDL-C)$  (for female) [20]

143  $BRI = 364.2 - 365.5 * (1 - ((0.5 * WC / \pi)^2 / (0.5 * Ht)^2))^{0.5}$  [21]

144 The unit of TG, HDL-c, and LDL-c was mmol/L.

145 TG was measured using the GPO-PAP (Hitachi 7600, Kyowa, Japan). HDL-c was measured using  
146 the Enzymatic method (Hitachi 7600, Kyowa, UK). Glucose was measured using the GOD-PAP  
147 (Hitachi 7600, Randox, UK).

#### 148 **2.4 Diagnostic Criteria and Definitions of Outcome**

149 Systolic and diastolic blood pressure values were determined based on the average of three  
150 separate measurements. Participants' blood pressure status, classified as either normal or  
151 elevated, was ascertained using sex- and age-specific cutoff values that are applicable to Chinese  
152 school-age children and adolescents. In accordance with Cook's criteria, elevated blood pressure  
153 is defined as a systolic or diastolic blood pressure equal to or greater than the 90th percentile  
154 for age, sex, and height [22]. The evaluation of blood pressure outcomes was conducted using  
155 three distinct categorization methods: hypertension (defined by elevated SBP or elevated DBP)  
156 versus non-hypertension; elevated SBP versus normal SBP; and elevated DBP versus normal  
157 DBP.

#### 158 **2.5 Statistical Analysis**

159 Data were presented as mean  $\pm$  standard deviation (SD) and median with interquartile range  
160 (IQR) for continuous variables or number (percentage), for categorical variables. Data on  
161 demographics, anthropometric and biochemistry measures were compared using the chi-square  
162 test, and Fisher's exact test for categorical variables. The Wilcoxon rank-sum test was performed  
163 for continuous variables. Multivariable logistic regression models were employed to evaluate the  
164 longitudinal associations of adiposity indices with incident hypertension, elevated SBP, and  
165 elevated DBP, respectively. Multivariable models were sequentially adjusted for (1) SBP, and/or



166 DBP; (2) plus age, and gender; and (3) plus baseline residence, eGFR, soft fruit drinks, and total  
167 carbohydrate intake. The areas under the receiver operator characteristics curve (AUC) were  
168 calculated to assess the prediction ability of adiposity indices for hypertension, elevated SBP,  
169 and elevated DBP. Continuous net reclassification improvement (NRI), and absolute integrated  
170 discrimination improvement (IDI) were used to assess whether adding the obesity-related  
171 measures could improve risk discrimination and reclassification for hypertension, elevated SBP,  
172 and elevated DBP prediction above the baseline SBP, /or DBP. The cross-lagged panel models  
173 were applied to analyze the temporal relationship between obesity-related measures (as  
174 continuous variables) and SBP, and/or DBP levels (as categorical variables). The lagged effect  
175 between the observed variables, the correlation between the selected adiposity indices (BMI, CI,  
176 WC, HC, TST and UAC, BRI) at each phase, and the residual variance of the observed variables  
177 (SBP, and/or DBP levels) were estimated in the cross-lagged panel analysis, which elucidates the  
178 temporal relationship between correlated variables and indicates the precursor variable.  
179 Several sensitivity analyses were performed to test the robustness of our findings. First, we  
180 treated obesity-related measures, SBP, and DBP as continuous variables, to determine the linear  
181 associations between adiposity indices and BP. Prespecified subgroup analyses were conducted  
182 based on age (7-12 years and 13-17 years), and gender (boys and girls) in secondary analyses. *P*  
183 < 0.05 (two-sided) was considered statistically significant. All analyses were conducted with SAS  
184 software (v.9.4, SAS Institute Inc., Cary, NC, USA).

### 185 **3. Result**

#### 186 **3.1 Baseline Characteristics of Pediatric and Adolescent Participants Across Various** 187 **Systolic and Diastolic Blood Pressure Groups**

188 Among the 227 participants included in the present analysis (64.8% of whom were boys), the  
189 mean age was 11.7 (SD,  $\pm 2.3$ ) years. During a median of 2 years of follow-up, 60 cases of incident  
190 hypertension (26.4%), 12 cases of incident elevated SBP (5.3%), and 58 cases of elevated DBP  
191 (25.6%) were identified. Children diagnosed with hypertension exhibited significantly higher  
192 measurements for WC, HC, BMI, TST, and BRI. Additionally, a higher proportion of these children  
193 were girls and were classified as overweight. Compared with the normal SBP group, the children  
194 and adolescents diagnosed with elevated SBP had a higher level of waist circumference, hip  
195 circumferences, BMI, TST, BRI, ferritin, total protein, as well as more proportions of overweight.  
196 Compared with the normal DBP group, the children and adolescents diagnosed with elevated  
197 DBP had a higher level of WC, HC, BMI, TST, low level of total carbohydrate intake, as well as  
198 more proportions of girls, overweight (*Table 1*).

### 199 **3.2 Correlations Between Body Adiposity Measures and the Onset of Hypertension**

200 The risk ratios (RRs) and 95% confidence intervals (CIs) of incident hypertension for each  
201 adiposity index (per SD) are shown in Figure 1. After adjusting for covariates, BMI, WC, HC, TST,  
202 and BRI were associated with a higher risk of hypertension. When defining the outcome as  
203 elevated SBP (SBP > P<sub>90</sub>), BMI, WC, HC, TST, UAC, SUA, CI, and BRI were associated with a higher  
204 risk of elevated SBP. While, BMI, WC, HC, TST, TG, and BRI were associated with a higher risk of  
205 elevated DBP (*Figure 1*).

### 206 **3.3 The Incremental Predictive Value of Adiposity Indices in Assessing the Risk of** 207 **Hypertension, High Systolic Blood Pressure, and High Diastolic Blood Pressure**

208 A total of seven adiposity indices were identified, including BMI, WC, HC, TST, UAC, BRI, and CI.  
209 The inclusion of HC and BRI was found to enhance the net reclassification ability and the overall

210 predicted probability for hypertension. Similarly, incorporating WC was shown to improve the  
211 net reclassification ability and the overall predicted probability for elevated SBP. Adding the WC,  
212 HC, and BRI could improve the net reclassification ability and overall predicted probability for  
213 elevated DBP. Furthermore, by incorporating BMI, WC, and HC into the basic model—which  
214 considers continuous SBP and DBP—the area under the curve (AUC) for hypertension  
215 prediction was significantly enhanced, increasing from 0.551 (95% CI: 0.463, 0.640) to 0.670  
216 (95% CI: 0.592, 0.748). For SBP prediction, the AUC remained high at 0.873, with a CI ranging  
217 from 0.771 to 0.974. Similarly, for elevated DBP prediction, the AUC improved from 0.531 (95%  
218 CI: 0.440, 0.621) to 0.649 (95% CI: 0.570, 0.729) (**Table 2**).

### 219 **3.4 The Temporal Dynamics of the Association Between Body Adiposity Measures and** 220 **Elevated Systolic/Diastolic Blood Pressure**

221 The fully cross-lagged model was used when compared to both the adiposity indices measures  
222 to BP levels (defined as elevated SBP or elevated DBP) and the BP levels to the obesity-related  
223 measures (**Figure 2**). Of note, there existed no directional associations between the most  
224 obesity-related measures and any hypertension symptoms. Baseline adiposity indices including  
225 WC, HC, TST, UAC, BRI, and CI were unidirectional longitudinally associated with hypertension  
226 symptoms (elevated SBP or elevated DBP). Cross-lagged path estimates showed that only BMI  
227 was directional and longitudinally associated with hypertension symptoms. Baseline SBP (in the  
228 2009 year) was longitudinally negatively associated with later BMI (in 2011 year), while  
229 baseline DBP (in 2009 year) was significantly positively associated with BMI (in 2011 year).

### 230 **3.5 Sensitivity and Subgroup Analysis**

231 In the sensitivity analysis, the linear analysis revealed significant longitudinal associations  
232 between various adiposity indices including BMI, WC, HC, TST, UAC, BSI, and BRI, with a higher  
233 risk of SBP and DBP, treated as continuous variables (**Supplementary Figure 2**). In subgroup  
234 analysis, the significant associations of BMI, WC, HC, TST, and BRI with risk of hypertension only  
235 existed in the younger age group (7~12 years) after accounting for multiple variables. In the  
236 subgroup classified by gender, the significant associations of BMI with the risk of hypertension  
237 only existed in girls. Whereas, the associations of UAC, and high level of TG with risk of  
238 hypertension only existed in boys (**Supplementary Table 2 and Supplementary Table 3**).

#### 239 **4. Discussion**

240 In this cohort study of the resident Chinese pediatric and adolescent population, we identified a  
241 significant correlation between elevated BMI, WC, HC, TST, and BRI with the prevalence of  
242 hypertension. This association remained consistent, regardless of initial systolic and diastolic  
243 blood pressure measurements, demographic variables, lifestyle factors, and eGFR. In contrast,  
244 we observed no significant link between hypertension and UAC, triglycerides (TG), HDL-c, blood  
245 glucose levels, serum uric acid (SUA), CI, BSI, and VFI. The relationships of these adiposity  
246 indices with both elevated SBP and DBP mirrored their associations with hypertension, with the  
247 exception that an increased UAC and CI were linked to a higher probability of elevated SBP. It is  
248 noteworthy that among the five adiposity indices, only BMI demonstrated a consistent,  
249 directional longitudinal association with the symptoms of hypertension.

250 Previous research has consistently highlighted the relationship between adiposity indices and  
251 pediatric hypertension [23,24]. Our study adds to the existing literature by providing evidence  
252 that an increased WC is positively correlated with elevated blood pressure in pediatric

253 populations. The accumulation of abdominal fat is known to secrete various adipokines and  
254 cytokines that can lead to endothelial dysfunction and increased peripheral vascular resistance,  
255 thereby contributing to the development of hypertension [25-27]. Moreover, our study reveals  
256 that an expanded HC is associated with a higher degree of fat deposition in the buttocks and  
257 thighs, consequently increasing the likelihood of hypertension in the pediatric population. TST  
258 could serve as a valuable anthropometric marker for assessing cardiovascular risk in children.  
259 This association may be attributed to the secretion of adipose-derived hormones and  
260 inflammatory cytokines that can lead to endothelial dysfunction and heightened vascular  
261 resistance [28]. The areas under the ROC curves for WC and HC in predicting pediatric  
262 hypertension were higher than those for BMI. These findings suggested that body fat  
263 distribution, rather than overall obesity, maybe a more sensitive predictor of cardiovascular  
264 health in the pediatric population [29].

265 The areas under the receiver operating characteristic (ROC) curves for WC and HC in the  
266 prediction of pediatric hypertension were notably higher compared to those for BMI. These  
267 results suggest that the distribution of body fat, rather than overall adiposity, may be a more  
268 sensitive predictor of cardiovascular health in the pediatric population. BRI, which quantifies  
269 visceral fat and total body fat percentages, was significantly associated with elevated blood  
270 pressure in children [30].

271 In prior research, the BRI has been identified as a more effective predictor than other  
272 anthropometric measures for assessing the risk of a range of clinical outcomes in adults. These  
273 include conditions such as cardiometabolic disorders, renal impairment, and malignancies  
274 [31-35]. There is an emerging consensus that visceral fat poses a significantly greater health risk

275 compared to subcutaneous fat, as it is more strongly associated with an increased risk of various  
276 diseases in adults [36-37]. While the concept that BRI can estimate total and regional fat  
277 percentages seems plausible and potentially superior in adults, the evidence linking BRI to  
278 diseases in children is currently limited. In the study, the area under the ROC curves for BRI in  
279 predicting pediatric hypertension was found to be lower compared to WC and HC. This suggests  
280 that BRI's predictive power for pediatric hypertension may not be as effective as it is in adults.  
281 Theoretically, assuming the shape of the body as an ellipse with the long axis height and the  
282 short axis WC, BRI can be calculated as the eccentricity of this ellipse via human modeling.  
283 Acknowledging the inherent disparities in body contours between the pediatric and adult  
284 demographics, it is crucial to appreciate that indices like the BRI may not be directly comparable  
285 across these groups. The efficacy of BRI as a predictor for hypertension could be subject to  
286 variation owing to the unique growth trajectories, body composition differences, and the  
287 influence of developmental milestones that are characteristic of the pediatric population.  
288 Therefore, the application of BRI in pediatric assessments should be approached with caution,  
289 and further research is needed to establish its validity and reliability in predicting hypertension  
290 specifically within the pediatric demographic. For practical reasons, there remains a need for a  
291 simple and effective children-specific indicator to better reflect visceral obesity. Our study  
292 revealed that UAC and CI were significantly correlated with systolic blood pressure but not with  
293 diastolic blood pressure. This distinction could be due to the different physiological mechanisms  
294 underlying the two types of blood pressure. Systolic blood pressure is more influenced by  
295 arterial stiffness, cardiac output, and abnormal changes in brain cortical structure, whereas  
296 diastolic blood pressure is more affected by peripheral vascular resistance [38,39]. The fact that

297 our measurements are more strongly associated with SBP may indicate a closer link with factors  
298 affecting arterial stiffness, and brain cortical structure.

299 Our study's findings suggest that in the pediatric population, there is no significant association  
300 between blood lipid levels (triglycerides, LDL-c, HDL-c, total cholesterol, SUA) and the  
301 development of hypertension. This observation challenges the widely held belief that  
302 dyslipidemia is a consistent predictor of cardiovascular risk, including hypertension in adults.  
303 The absence of a correlation in our pediatric cohort could be attributed to several factors. First,  
304 the pathophysiology of hypertension in children may differ fundamentally from that in adults,  
305 where lipid metabolism plays a more established role [40]. Children are in a dynamic phase of  
306 growth and development, with a rapidly changing metabolic profile that might not yet be fully  
307 aligned with the traditional risk factors seen in adulthood [41].

308 Additionally, the dietary and lifestyle factors that significantly influence lipid profiles in adults  
309 may not have had sufficient time to exert their effects in children. As children's dietary habits  
310 and physical activity levels evolve, their lipid profiles may not have stabilized to a point where  
311 they can significantly influence blood pressure. The association between adiposity indices and  
312 hypertension in children appears to be age-dependent, with our study indicating a significant  
313 correlation within the 7 to 12 years age group, which was not observed in the 13 to 18 years age  
314 group. This age-specific association may reflect the dynamic changes in growth, development,  
315 and metabolic patterns that occur during childhood and adolescence. The physiological changes  
316 during adolescence, including growth spurts, hormonal fluctuations, and the maturation of  
317 various organ systems, could influence the relationship between adiposity indices and blood  
318 pressure in complex ways that are not yet fully understood. The distribution of body fat and its

319 metabolic impact may be different in adolescents compared to adults, potentially mitigating the  
320 effects of excess adiposity on blood pressure regulation.

### 321 **Strengths and Limitations**

322 A significant advantage of our study is its community-based approach, which successfully  
323 enrolled a substantial sample of children and adolescents aged 7 to 17 in China. This age group  
324 has been notably underrepresented in research pertaining to pediatric hypertension.  
325 Limitations include the possibility of residual confounding inherent to the observational design,  
326 including the possibility of differential distribution of unmeasured or incompletely measured  
327 confounders such as birth weight and gestational age. We can also not exclude limitations in the  
328 generalizability of the results in this CHNS cohort with access to health care and the existence of  
329 withdrawal bias. Besides, different criteria for recognizing overweight and obesity in children  
330 may influence the accuracy of the estimation.

### 331 **5. Conclusions and Implications**

332 Our study identified that several adiposity indices—namely BMI, WC, HC, TST, and BRI— were  
333 correlated with a heightened risk of hypertension among Chinese children and adolescents.  
334 Notably, only BMI demonstrated a consistent, directional relationship with the longitudinal  
335 presentation of hypertension symptoms. Moreover, the pronounced associations between these  
336 adiposity indices and the risk of hypertension were predominantly observed in the younger age  
337 group, ranging from 7 to 12 years old.

### 338 **Figure Legends**

339 **Figure 1** Associations between anthropometric indices/metabolic measures and hypertension  
340 diagnosis (Abbreviations: BMI, body mass index; BRI, body roundness index; CI, conicity index;



341 DBP, diastolic blood pressure; HC, hip circumference; SBP, systolic blood pressure; TST, triceps  
342 skinfold thickness; UAC, upper arm circumference; WC, waist circumference; WHR, waist-to-hip  
343 ratio. \*  $0.01 < P \leq 0.05$ ; \*\*  $0.001 < P \leq 0.01$ ; \*\*\*  $P < 0.001$ )

344 **Figure 2** Estimates from the cross-lagged model for the associations between anthropometry  
345 parameters and incident hypertension classified by elevated SBP and elevated DBP  
346 (Abbreviations: BMI, body mass index; BRI, body roundness index; CI, conicity index; DBP,  
347 diastolic blood pressure; HC, hip circumference; SBP, systolic blood pressure; TST, triceps  
348 skinfold thickness; UAC, upper arm circumference; WC, waist circumference. All estimates were  
349 standardized. \*  $0.01 < P \leq 0.05$ ; \*\*  $0.001 < P \leq 0.01$ ; \*\*\*  $P < 0.001$ ).

## 350 Reference

- 351 1. Song P, Zhang Y, Yu J, Zha M, Zhu Y, Rahimi K, et al. Global Prevalence of Hypertension in  
352 Children: A Systematic Review and Meta-analysis. *JAMA Pediatr.* 2019;173(12):1154-1163.  
353 doi: 10.1001/jamapediatrics.2019.3310.
- 354 2. Flynn JT, Kaelber DC, Baker-Smith CM, Blowey D, Carroll AE, Daniels SR, et al.;  
355 SUBCOMMITTEE ON SCREENING AND MANAGEMENT OF HIGH BLOOD PRESSURE IN  
356 CHILDREN. Clinical Practice Guideline for Screening and Management of High Blood  
357 Pressure in Children and Adolescents. *Pediatrics.* 2017;140(3):e20171904. doi:  
358 10.1542/peds.2017-1904.
- 359 3. Yang L, Magnussen CG, Yang L, Bovet P, Xi B. Elevated blood pressure in childhood or  
360 adolescence and cardiovascular outcomes in adulthood: a systematic review. *Hypertension.*  
361 2020;75(4):948-955. doi:10.1161/HYPERTENSIONAHA.119.14168

- 362 4. Chung J, Robinson C, Sheffield L, Paramanathan P, Yu A, Ewusie J, et al. Prevalence of  
363 pediatric masked hypertension and risk of subclinical cardiovascular outcomes: a  
364 systematic review and meta-analysis. *Hypertension*. 2023;80(11):2280-2292.  
365 doi:10.1161/HYPERTENSIONAHA.123.20967.
- 366 5. Zhang X, Liu J, Ni Y, Yi C, Fang Y, Ning Q, et al. Global Prevalence of Overweight and Obesity  
367 in Children and Adolescents: A Systematic Review and Meta-Analysis. *JAMA Pediatr*. 2024  
368 Aug 1;178(8):800-813. doi: 10.1001/jamapediatrics.2024.1576. PMID: 38856986; PMCID:  
369 PMC11165417.
- 370 6. Lobstein T, Brinsden H. On behalf of World Obesity Federation. Atlas of childhood obesity.  
371 World Obesity Federation; 2019.
- 372 7. Flynn J. The changing face of pediatric hypertension in the era of the childhood obesity  
373 epidemic. *Pediatr Nephrol*. 2013;28(7):1059-1066. doi:10.1007/s00467-012-2344-0
- 374 8. Muntner P, He J, Cutler JA, Wildman RP, Whelton PK. Trends in blood pressure among  
375 children and adolescents. *JAMA*. 2004;291(17): 2107-2113. doi:10.1001/jama.291.17.2107.
- 376 9. Koebnick C, Sidell MA, Li X, Woolford SJ, Kuizon BD, Kunani P. Association of High Normal  
377 Body Weight in Youths With Risk of Hypertension. *JAMA Netw Open*. 2023; 6(3):e231987.  
378 doi: 10.1001/jamanetworkopen.2023.1987. PMID: 3691711MC10015306.
- 379 10. Zong X, Kelishadi R, Hong YM, Schwandt P, Matsha TE, Mill JG, et al. Establishing  
380 international optimal cut-offs of waist-to-height ratio for predicting cardiometabolic risk in  
381 children and adolescents aged 6-18 years. *BMC Med*. 2023; 21(1):442. doi:

382 10.1186/s12916-023-03169-y.

383 11. Ge W, Yi L, Xiao C, Xiao Y, Liu J, Liang F, Yin J, Hu J. Effectiveness of a body shape index in  
384 predicting pediatric high blood pressure. *Pediatr Res.* 2022;92(3):871-879. doi:  
385 10.1038/s41390-021-01844-5.

386 12. Chen R, Ji L, Chen Y, Meng L. Weight-to-height ratio and body roundness index are superior  
387 indicators to assess cardio-metabolic risks in Chinese children and adolescents: compared  
388 with body mass index and a body shape index. *Transl Pediatr.* 2022;11(3):318-329. doi:  
389 10.21037/tp-21-479.

390 13. Popkin BM, Du S, Zhai F, Zhang B. Cohort Profile: The China Health and Nutrition Survey–  
391 monitoring and Understanding Socio-Economic and Health Change in China, 1989-2011. *Int*  
392 *J Epidemiol* (2010) 39(6):1435–40. doi: 10.1093/ije/dyp322.

393 14. Yan S, Li J, Li S, Zhang B, Du S, Gordon-Larsen P, et al. The Expanding Burden of  
394 Cardiometabolic Risk in China: The China Health and Nutrition Survey. *Obes Rev* (2012)  
395 13(9):810–21. doi: 10.1111/j.1467-789X.2012.01016.x.

396 15. Schwartz GJ, Muñoz A, Schneider MF, Mak RH, Kaskel F, Warady BA, et al. New equations to  
397 estimate GFR in children with CKD. *J Am Soc Nephrol.* 2009; 20(3):629-37. doi:  
398 10.1681/ASN.2008030287.

399 16. WS/T611-2018; High Waist Circumference Screening Threshold among Children and  
400 Adolescents Aged 7–17 Years. National Health and Family Planning Commission of People's  
401 Republic of China: Beijing, China, 2018.

- 402 17. Endocrinology, Genetics and Metabolism Group, Chinese Society of Pediatrics. Definition  
403 and prevention and treatment of metabolic syndrome in children and adolescents in China.  
404 Chinese Journal of Pediatrics, 2012, 50: 420-422.
- 405 18. Valdez R. A simple model-based index of abdominal adiposity. J Clin Epidemiol.  
406 1991;44(9):955-6. doi: 10.1016/0895-4356(91)90059-i.
- 407 19. Krakauer NY, Krakauer JC. A new body shape index predicts mortality hazard independently  
408 of body mass index. PLoS One. 2012; 7(7): e39504. doi: 10.1371/journal.pone.0039504.
- 409 20. Huang J, Zhou C, Li Y, Zhu S, Liu A, Shao X, et al. Visceral adiposity index,  
410 hypertriglyceridemic waist phenotype and chronic kidney disease in a southern Chinese  
411 population: a cross-sectional study. Int Urol Nephrol. 2015; 47(8): 1387-96. doi:  
412 10.1007/s11255-015-1040-y.
- 413 21. Thomas DM, Bredlau C, Bosy-Westphal A, Mueller M, Shen W, Gallagher D, et al.  
414 Relationships between body roundness with body fat and visceral adipose tissue emerging  
415 from a new geometrical model. Obesity (Silver Spring). 2013; 21(11): 2264-71. doi:  
416 10.1002/oby.20408.
- 417 22. Writing group of Chinese Guidelines for Management of Hypertension; Chinese  
418 Hypertension League; Chinese Society of Cardiology; Chinese Medical Doctor Association  
419 Hypertension Committee; Hypertension Branch of China International Exchange and  
420 Promotive Association for Medical and Health Care; Hypertension Branch of Chinese  
421 Geriatric Medical Association. 2018 Chinese Guidelines for Prevention and Treatment of  
422 Hypertension. Chin. J. Cardiovasc. Med. 2018, 24, 24–56.

- 423 23. Ferreira S. Obesity and hypertension in children: a worldwide problem. *Rev Port Cardiol*  
424 (Engl Ed). 2018;37(5): 433-434. doi:10.1016/j.repc.2018.04.006.
- 425 24. Koebnick C, Sidell MA, Li X, Woolford SJ, Kuizon BD, Kunani P. Association of High Normal  
426 Body Weight in Youths With Risk of Hypertension. *JAMA Netw Open*. 2023;6(3):e231987.  
427 doi: 10.1001/jamanetworkopen.2023.1987.
- 428 25. Cefalo CMA, Riccio A, Fiorentino TV, Rubino M, Mannino GC, Succurro E, et al. Endothelial  
429 dysfunction is associated with reduced myocardial mechano-energetic efficiency in  
430 drug-naïve hypertensive individuals. *Intern Emerg Med*. 2023;18(8):2223-2230. doi:  
431 10.1007/s11739-023-03402-9.
- 432 26. Markopoulou P, Koutroumpa A, Mantzou A, Margeli A, Papanikolaou E, Siahaidou T.  
433 Association of Plasma Irisin Levels with Circulating Endothelial Microparticles (EMPs) and  
434 Endothelial Progenitor Cells (EPCs) in Children Born Prematurely. *Metabolites*. 2023;  
435 13(1):120. doi: 10.3390/metabo13010120.
- 436 27. Markopoulou P, Papanikolaou E, Loukopoulou S, Galina P, Mantzou A, Siahaidou T.  
437 Increased circulating endothelial progenitor cells (EPCs) in prepubertal children born  
438 prematurely: a possible link between prematurity and cardiovascular risk. *Pediatr Res*.  
439 2021;90(1):156-165. doi: 10.1038/s41390-020-01190-y.
- 440 28. Ouyang F, Wells JC, Zhang GH, Du K, Wang X, Shen L, et al. Maternal Prenatal Factors and  
441 Child Adiposity in Associations with Cardiometabolic Risk Factors in Term-Born Chinese  
442 Children at the Age of 2 Years. *Nutrients*. 2023;15(15):3342. doi: 10.3390/nu15153342.

- 443 29. Kim MS, Kim WJ, Khera AV, Kim JY, Yon DK, Lee SW, et al. Association between adiposity and  
444 cardiovascular outcomes: an umbrella review and meta-analysis of observational and  
445 Mendelian randomization studies. *Eur Heart J.* 2021; 42(34):3388-3403. doi:  
446 10.1093/eurheartj/ehab454.
- 447 30. ThomasDM,BredlauC,Bosy-WestphalA,etal.Relationshipsbetweenbodyroundnesswithbodyf  
448 atand visceral adipose tissue emerging from a newgeometricalmodel.Obesity(Silver Spring).  
449 2013;21(11):2264-2271. doi:10.1002/oby.20408.
- 450 31. Cai X, Song S, Hu J, Zhu Q, Yang W, Hong J, et al. Body roundness index improves the  
451 predictive value of cardiovasculardiseaserisk in hypertensive patients with obstructive  
452 sleep apnea: a cohort study. *Clin Exp Hypertens.* 2023; 45(1): 2259132.  
453 doi:10.1080/10641963.2023.2259132.
- 454 32. Rico-Martín S, Calderón-García JF, Sánchez-Rey P, Franco-Antonio C, Martínez Alvarez M,  
455 Sánchez Muñoz, et al. Effectiveness of body roundness index in predicting metabolic  
456 syndrome: a systematic review and meta-analysis. *Obes Rev.* 2020; 21(7):e13023.  
457 doi:10.1111/obr.13023.
- 458 33. Wu L, Pu H, Zhang M, Hu H, Wan Q. Non-linear relationship between the body roundness  
459 index and incident type 2 diabetes in Japan: a secondary retrospective analysis. *J Transl Med.*  
460 2022; 20(1):110. doi:10.1186/s12967022-03321-x.
- 461 34. Zhang Y, Gao W, Ren R, Liu Y, Li B, Wang A. et al. Body roundness index is related to the low  
462 estimated glomerular filtration rate in Chinese population: a cross-sectional study. *Front*  
463 *Endocrinol (Lausanne).* 2023;14:1148662. doi:10.3389/fendo.2023.1148662.

- 464 35. Gao W, Jin L, Li D, Zhang Y, Zhao W, Zhao Y, et al. The association between the body  
465 roundness index and the risk of colorectal cancer: a cross-sectional study. *Lipids Health Dis.*  
466 2023; 22(1):53. doi:10.1186/s12944-023-01814-2.
- 467 36. Gruzdeva O, Borodkina D, Uchasova E, Dyleva Y, Barbarash O. Localization of fat depots and  
468 cardiovascular risk. *Lipids Health Dis.* 2018;17(1): 218. doi:10.1186/ s12944-018-0856-8
- 469 37. Koenen M, Hill MA, Cohen P, Sowers JR. Obesity, adipose tissue and vascular dysfunction.  
470 *Circ Res.* 2021;128 (7):951-968. doi:10.1161/CIRCRESAHA.121. 318093.
- 471 38. Jeemon P, Harikrishnan S. Systolic blood pressure and cardiovascular health. *Nat Med.*  
472 2022;28(10):2003-2004. doi: 10.1038/s41591-022-02005-9.
- 473 39. Fatani N, Dixon DL, Van Tassell BW, Fanikos J, Buckley LF. Systolic Blood Pressure Time in  
474 Target Range and Cardiovascular Outcomes in Patients With Hypertension. *J Am Coll*  
475 *Cardiol.* 2021;77(10):1290-1299. doi: 10.1016/j.jacc.2021.01.014.
- 476 40. Wicklow B, Retnakaran R. Gestational Diabetes Mellitus and Its Implications across the Life  
477 Span. *Diabetes Metab J.* 2023;47(3):333-344. doi: 10.4093/dmj.2022.0348.
- 478 41. Zamojska J, Niewiadomska-Jarosik K, Kierzkowska B, Gruca M, Wosiak A, Smolewska E.  
479 Lipid Profile in Children Born Small for Gestational Age. *Nutrients.* 2023; 15(22):4781. doi:  
480 10.3390/nu15224781.

**Table 1 Baseline characteristics of the individuals stratified by Hypertension, Systolic BP and Diastolic BP in the CHNS dataset (n=262)**

|                                      | Hypertension     | Non-hypertension | <i>P value</i> | Systolic BP> P <sub>90</sub> | Systolic BP≤P <sub>90</sub> | <i>P value</i> | Diastolic BP> P <sub>90</sub> | Diastolic BP≤P <sub>90</sub> | <i>P value</i> |
|--------------------------------------|------------------|------------------|----------------|------------------------------|-----------------------------|----------------|-------------------------------|------------------------------|----------------|
| Participants (n)                     | 60               | 167              |                | 12                           | 215                         |                | 58                            | 169                          |                |
| <b>Demographics</b>                  |                  |                  |                |                              |                             |                |                               |                              |                |
| Age (years)                          | 12.0 (2.4)       | 11.6 (2.3)       | 0.301          | 12.7 (2.7)                   | 11.7 (2.3)                  | 0.151          | 12 (2.5)                      | 11.7 (2.2)                   | 0.380          |
| Boys (%)                             | 28 (46.7)        | 119 (71.3)       | <0.001         | 9 (75.0)                     | 138 (64.2)                  | 0.651          | 26 (44.8)                     | 121 (71.6)                   | <0.001         |
| Rural (%)                            | 43 (71.7)        | 132 (79.0)       | 0.244          | 7 (58.3)                     | 168 (78.1)                  | 0.217          | 41 (70.7)                     | 134 (79.3)                   | 0.177          |
| <b>Anthropometry parameters</b>      |                  |                  |                |                              |                             |                |                               |                              |                |
| Waist circumference (cm)             | 68.9 (11.4)      | 63.8 (9.7)       | 0.001          | 79.7 (13.7)                  | 64.4 (9.5)                  | 0.003          | 68.3 (11.1)                   | 64.1 (9.9)                   | 0.009          |
| Hip circumference (cm)               | 82.0 (10.5)      | 76.8 (11.1)      | 0.002          | 90.1 (11.1)                  | 77.5 (10.8)                 | <0.001         | 81.5 (10.2)                   | 77 (11.3)                    | 0.009          |
| WHR                                  | 0.84 (0.10)      | 0.83 (0.08)      | 0.307          | 0.84 (0.09)                  | 0.83 (0.09)                 | 0.730          | 0.84 (0.10)                   | 0.83 (0.08)                  | 0.495          |
| BMI (kg/m <sup>2</sup> )             | 18.2 (4.0)       | 16.7 (3.0)       | 0.008          | 20.9 (5.0)                   | 16.9 (3.1)                  | <0.001         | 18.0 (4.0)                    | 16.8 (3.0)                   | 0.028          |
| Overweight (> P <sub>75</sub> )      | 10 (16.7)        | 15 (9.0)         | 0.103          | 5 (41.7)                     | 20 (9.3)                    | <0.001         | 9 (15.5)                      | 16 (9.5)                     | 0.204          |
| Systolic BP (mm Hg)                  | 95.5 (13.4)      | 93.3 (10.7)      | 0.250          | 109.0 (8.7)                  | 93.1 (11.0)                 | <0.001         | 94.8 (13.0)                   | 93.6 (11.0)                  | 0.496          |
| Diastolic BP (mm Hg)                 | 61.5 (8.0)       | 61 (6.7)         | 0.647          | 68.1 (5.3)                   | 60.7 (7.0)                  | <0.001         | 61.1 (7.9)                    | 61.1 (6.8)                   | 0.980          |
| Triceps Skinfold Thickness (TST, cm) | 1.28 (0.93-1.73) | 1.07 (0.73-1.53) | 0.008          | 1.95 (0.97-3.7)              | 1.10 (0.80-1.57)            | 0.015          | 1.22 (0.93-1.70)              | 1.1 (0.73-1.57)              | 0.030          |
| Upper Arm Circumference (cm)         | 22 (4.5)         | 21 (4.4)         | 0.095          | 26 (4.8)                     | 21 (4.3)                    | <0.001         | 22 (4.3)                      | 21 (4.5)                     | 0.283          |
| <b>Blood tests</b>                   |                  |                  |                |                              |                             |                |                               |                              |                |
| Albumin, g/L                         | 48.6 (3.1)       | 48.2 (3.2)       | 0.456          | 49.8 (3.6)                   | 48.2 (3.1)                  | 0.095          | 48.5 (2.9)                    | 48.2 (3.3)                   | 0.539          |



|                                       |                        |                        |       |                        |                        |       |                        |                        |       |
|---------------------------------------|------------------------|------------------------|-------|------------------------|------------------------|-------|------------------------|------------------------|-------|
| Alanine Transaminase, U/L             | 13.0 (10.5-15.0)       | 14.0 (11.0-18.0)       | 0.286 | 13.5 (11.5-25.0)       | 14.0 (10.0-17.0)       | 0.271 | 13.0 (10.0-15.0)       | 14.0 (11.0-18.0)       | 0.183 |
| Apolipoprotein B, mg/dL               | 0.7 (0.5-0.8)          | 0.6 (0.5-0.7)          | 0.142 | 0.7 (0.5-0.9)          | 0.6 (0.5-0.7)          | 0.212 | 0.6 (0.5-0.8)          | 0.6 (0.5-0.7)          | 0.287 |
| Apolipoprotein A-1, mg/dL             | 0.96 (0.85-1.09)       | 0.98 (0.87-1.09)       | 0.558 | 1.04 (0.96-1.10)       | 0.97 (0.86-1.09)       | 0.196 | 0.95 (0.84-1.06)       | 0.98 (0.87-1.09)       | 0.339 |
| Ferritin, ng/ml                       | 43.4 (28.6-65.1)       | 43.9 (28.4-58.0)       | 0.591 | 64.3 (45.6-78.0)       | 42.8 (28.4-58.1)       | 0.048 | 42.7 (28.6-63.0)       | 43.9 (28.8-58.2)       | 0.866 |
| Serum magnesium, mmol/L               | 0.94 (0.09)            | 0.95 (0.07)            | 0.424 | 0.93 (0.12)            | 0.95 (0.07)            | 0.579 | 0.95 (0.09)            | 0.95 (0.07)            | 0.569 |
| Transferrin, mg/gl                    | 287.5<br>(264.5-329.0) | 295.0<br>(265.0-325.0) | 0.972 | 299.0<br>(269.0-321.5) | 293.0<br>(265.0-325.0) | 0.871 | 287.5<br>(265.0-330.0) | 295.0<br>(265.0-325.0) | 0.900 |
| Soluble Transferrin receptor,<br>mg/L | 1.5 (1.3-2.0)          | 1.5 (1.3-1.9)          | 0.654 | 1.5 (1.3-2.0)          | 1.5 (1.3-1.9)          | 0.977 | 1.5 (1.3-1.9)          | 1.5 (1.3-1.9)          | 0.675 |
| Total protein, g/L                    | 76.6 (5.3)             | 76.2 (4.8)             | 0.570 | 79.1 (5.2)             | 76.1 (4.9)             | 0.040 | 76.5 (5.3)             | 76.2 (4.8)             | 0.738 |
| Serum uric acid, mg/dL                | 5.2 (1.5)              | 5.1 (1.3)              | 0.801 | 5.7 (1.6)              | 5.1 (1.3)              | 0.108 | 5.2 (1.5)              | 5.1 (1.3)              | 0.937 |
| Total cholesterol, mmol/L             | 4.0 (0.7)              | 3.8 (0.6)              | 0.035 | 4.0 (0.8)              | 3.8 (0.6)              | 0.298 | 4 (0.6)                | 3.8 (0.6)              | 0.068 |
| HDL cholesterol, mmol/L               | 1.4 (1.2-1.7)          | 1.4 (1.2-1.6)          | 0.771 | 1.4 (1.3-1.6)          | 1.4 (1.2-1.6)          | 0.678 | 1.3 (1.2-1.6)          | 1.4 (1.2-1.6)          | 0.613 |
| LDL cholesterol, mmol/L               | 2.2 (1.8-2.6)          | 2.2 (1.7-2.6)          | 0.249 | 2.2 (1.7-2.8)          | 2.2 (1.8-2.6)          | 0.708 | 2.2 (1.8-2.6)          | 2.2 (1.8-2.6)          | 0.344 |
| Triglycerides, mg/dL                  | 0.8 (0.5-1.3)          | 0.7 (0.5-1.1)          | 0.745 | 0.8 (0.5-1.3)          | 0.7 (0.5-1.2)          | 0.759 | 0.8 (0.5-1.2)          | 0.7 (0.5-1.1)          | 0.939 |
| eGFR, ml/ min/1.73m <sup>2</sup>      | 82.4 (9.2)             | 81.3 (11.6)            | 0.481 | 81.6 (6.8)             | 81.6 (11.1)            | 0.991 | 82.6 (9.2)             | 81.3 (11.6)            | 0.427 |
| HbA1c, %                              | 5.3 (0.4)              | 5.3 (0.4)              | 0.907 | 5.2 (0.5)              | 5.3 (0.4)              | 0.768 | 5.3 (0.4)              | 5.3 (0.4)              | 0.862 |
| Blood Glucose, mmol/L                 | 4.8 (0.5)              | 4.9 (0.5)              | 0.729 | 5.1 (0.5)              | 4.8 (0.5)              | 0.075 | 4.8 (0.5)              | 4.9 (0.5)              | 0.442 |
| Creatinine, mg/dL                     | 67.0 (62.0-75.0)       | 67.0 (61.0-73.0)       | 0.651 | 70.0 (63.5-76.0)       | 67.0 (61.0-73.0)       | 0.177 | 66.5 (62.0-74.0)       | 67.0 (61.0-73.0)       | 0.917 |
| <b><i>Anthropometric indices</i></b>  |                        |                        |       |                        |                        |       |                        |                        |       |
| CI                                    | 1.15 (1.07-1.23)       | 1.13 (1.08-1.19)       | 0.427 | 1.20 (1.11-1.31)       | 1.13 (1.08-1.19)       | 0.058 | 1.14 (1.07-1.25)       | 1.13 (1.08-1.19)       | 0.559 |
| BSI                                   | 0.08 (0.08-0.09)       | 0.08 (0.08-0.08)       | 0.432 | 0.08 (0.08-0.09)       | 0.08 (0.08-0.08)       | 0.399 | 0.08 (0.07-0.09)       | 0.08 (0.08-0.08)       | 0.449 |
| VFI                                   | 0.92 (0.48-1.44)       | 0.70 (0.43-1.15)       | 0.139 | 0.77 (0.51-1.42)       | 0.74 (0.43-1.25)       | 0.650 | 0.92 (0.48-1.43)       | 0.7 (0.43-1.16)        | 0.186 |
| BRI                                   | 2.26 (1.67-3.31)       | 1.95 (1.53-2.4)        | 0.025 | 3.55 (1.68-5.17)       | 1.97 (1.53-2.47)       | 0.021 | 2.19 (1.59-3.20)       | 1.95 (1.53-2.42)       | 0.061 |
| <b><i>Health-related behavior</i></b> |                        |                        |       |                        |                        |       |                        |                        |       |

|                                      |                           |                           |       |                           |                           |       |                           |                           |       |
|--------------------------------------|---------------------------|---------------------------|-------|---------------------------|---------------------------|-------|---------------------------|---------------------------|-------|
| Soft/Sugared fruit drinks            | 54 (90.0)                 | 146 (88.0)                | 0.670 | 12 (100.0)                | 188 (87.9)                | 0.369 | 52 (89.7)                 | 148 (88.1)                | 0.748 |
| Total protein intake (g/day)         | 49.8 (40.5-60.7)          | 50.2 (39.4-67.2)          | 0.530 | 50.8 (42.7-69.4)          | 50.1 (39.2-64.6)          | 0.338 | 49.8 (40.5-60.5)          | 50.2 (39.7-67.2)          | 0.433 |
| Total fat intake (g/day)             | 55.1 (34.7-72.2)          | 53.3 (36.9-71.3)          | 0.830 | 1710.0<br>(1395.0-2078.9) | 1645.4<br>(1324.6-1937.6) | 0.205 | 1621.7<br>(1240.7-1928.7) | 1670.9<br>(1357.8-1947.7) | 0.930 |
| Total carbohydrate intake<br>(g/day) | 218.9<br>(174.8-260.4)    | 235.7<br>(198.8-276.9)    | 0.076 | 218.9<br>(149.8-327.4)    | 234.3<br>(192.3-270.2)    | 0.563 | 218.9<br>(174.8-259.2)    | 235.7<br>(199.5-276.9)    | 0.045 |
| Total energy intake<br>(kcal/day)    | 1621.7<br>(1240.7-1933.9) | 1670.9<br>(1353.3-1947.7) | 0.317 | 61.8 (51.0-67.2)          | 52.4 (35.6-71.7)          | 0.641 | 51.0 (34.7-72.2)          | 53.4 (36.9-70.2)          | 0.218 |

Abbreviation: BMI, body mass index; BP, blood pressure; BSI, body shape index; BRI, body roundness index; CI, conicity index; eGFR, estimated glomerular filtration rate; HDL, high-density lipoprotein; HbA1c: Hemoglobin A1C; LDL, low-density lipoprotein; VFI, visceral fat index; WHR, waist to hip circumference ratio. Data are presented as No. (%), mean± SD; \*P values were calculated by using T test or Wilcoxon test for continuous variables and  $\chi^2$  test or fisher exact test for categorical variables.

1

Table 2 Performance of Risk Prediction Models for 2-Year Risk of Incident Hypertension by Including selected Anthropometry parameters and metabolic Measures

|                                                         | AUC (95% CI)         | Difference (95% CI)   | NRI (95% CI)           | Absolute IDI (95% CI)  |
|---------------------------------------------------------|----------------------|-----------------------|------------------------|------------------------|
| <b>2-Year diagnosis of Hypertension</b>                 |                      |                       |                        |                        |
| Basic model <sup>a</sup>                                | 0.551 (0.463, 0.640) | Reference             | Reference              | Reference              |
| Basic model+BMI                                         | 0.624 (0.542, 0.707) | 0.073 (-0.014, 0.161) | 0.165 (-0.120, 0.451)  | 0.036 (0.005, 0.066)*  |
| Basic model+Waist circumference                         | 0.641 (0.559, 0.724) | 0.090 (-0.012, 0.192) | 0.244 (-0.044, 0.531)  | 0.044 (0.013, 0.075)** |
| Basic model+Hip circumference                           | 0.646 (0.563, 0.729) | 0.095 (-0.001, 0.190) | 0.468 (0.189, 0.748)*  | 0.040 (0.013, 0.066)** |
| Basic model+TST                                         | 0.625 (0.542, 0.707) | 0.073 (-0.029, 0.176) | 0.148 (0.076, 0.658)*  | 0.027 (-0.009, 0.063)  |
| Basic model+BRI                                         | 0.605 (0.518, 0.692) | 0.054 (-0.048, 0.156) | 0.360 (0.069, 0.651)*  | 0.041 (0.007, 0.074)*  |
| Basic model+BRI, Hip circumference                      | 0.655 (0.574, 0.735) | 0.103 (0.003, 0.204)* | 0.527 (0.241, 0.812)*  | 0.056 (0.020, 0.092)** |
| Basic model+BMI, Waist circumference, Hip circumference | 0.670 (0.592, 0.748) | 0.119 (0.021, 0.217)* | 0.455 (0.168, 0.742)** | 0.051 (0.018, 0.084)** |
| <b>2-Year diagnosis of Elevated Systolic BP</b>         |                      |                       |                        |                        |
| Basic model <sup>b</sup>                                | 0.873 (0.771, 0.974) | Reference             | Reference              | Reference              |
| Basic model+BMI                                         | 0.889 (0.795, 0.982) | 0.016 (-0.026, 0.058) | 0.243 (-0.324, 0.818)  | 0.051 (0.034, 0.137)   |
| Basic model+Waist circumference                         | 0.896 (0.797, 0.995) | 0.023 (-0.036, 0.082) | 0.700 (0.153, 1.249)*  | 0.113 (0.001, 0.225)*  |
| Basic model+Hip circumference                           | 0.885 (0.783, 0.987) | 0.013 (-0.029, 0.054) | 0.209 (-0.365, 0.782)  | 0.037 (-0.02, 0.094)   |
| Basic model+TST                                         | 0.885 (0.779, 0.991) | 0.013 (-0.048, 0.073) | 0.413 (-0.160, 0.986)  | 0.144 (-0.031, 0.318)  |
| Basic model+Upper Arm circumference                     | 0.888 (0.801, 0.975) | 0.015 (-0.026, 0.057) | 0.784 (0.277, 1.290)*  | 0.048 (-0.018, 0.114)  |
| Basic model+CI                                          | 0.888 (0.777, 0.999) | 0.017 (-0.030, 0.063) | 0.340 (-0.240, 0.919)  | 0.038 (-0.030, 0.105)  |

|                                                         |                      |                       |                        |                        |
|---------------------------------------------------------|----------------------|-----------------------|------------------------|------------------------|
| Basic model+BRI                                         | 0.886 (0.766, 1.000) | 0.014 (-0.049, 0.077) | 0.711 (0.142, 1.280)*  | 0.158 (-0.011, 0.328)  |
| Basic model+BRI, Hip circumference                      | 0.893 (0.776, 1.000) | 0.021 (-0.039, 0.081) | 0.636 (0.066, 1.207)*  | 0.157 (-0.01, 0.325)   |
| Basic model+BMI, Waist circumference, Hip circumference | 0.897 (0.797, 0.996) | 0.024 (-0.034, 0.083) | 0.710 (0.163, 1.258)*  | 0.113 (0.001, 0.224)*  |
| <b>2-Year diagnosis of Elevated Diastolic BP</b>        |                      |                       |                        |                        |
| Basic model <sup>c</sup>                                | 0.531 (0.440, 0.621) | Reference             | Reference              | Reference              |
| Basic model+BMI                                         | 0.605 (0.523, 0.687) | 0.108 (-0.027, 0.242) | 0.200 (-0.089, 0.490)  | 0.044 (0.015, 0.072)** |
| Basic model+Waist circumference                         | 0.623 (0.537, 0.709) | 0.125 (-0.012, 0.263) | 0.333 (0.039, 0.628)*  | 0.037 (0.009, 0.065)** |
| Basic model+Hip circumference                           | 0.631 (0.547, 0.714) | 0.134 (0.008, 0.259)* | 0.456 (0.175, 0.738)** | 0.043 (0.014, 0.072)** |
| Basic model+TST                                         | 0.597 (0.511-0.683)  | 0.100 (-0.042-0.242)  | 0.322 (0.027,0.618)*   | 0.013 (-0.021-0.046)   |
| Basic model+BRI                                         | 0.575 (0.480, 0.670) | 0.078 (-0.072, 0.228) | 0.349 (0.054,0.643)*   | 0.052 (0.017, 0.087)** |
| Basic model+BRI, Hip circumference                      | 0.639 (0.556, 0.721) | 0.141 (0.006, 0.277)* | 0.577 (0.292, 0.861)** | 0.037 (0.009, 0.065)** |
| Basic model+BMI, Waist circumference, Hip circumference | 0.649 (0.570, 0.729) | 0.152 (0.022, 0.282)* | 0.349 (0.054, 0.643)** | 0.044 (0.014, 0.073)** |

- 2 Abbreviations: AUC, area under curve; BMI, body mass index; BRI, body roundness index; CI, conicity index; eGFR, estimated glomerular filtration rate; TST, triceps skinfold thickness. a Basic  
3 model: baseline age, gender, systolic BP, diastolic BP, and eGFR. b Basic model: baseline age, gender, systolic BP, and eGFR; c Basic model: baseline age, gender, diastolic BP. \*
- 4 0.01<P≤0.05; \*\* 0.001<P≤0.01; \*\*\* P≤0.001

5

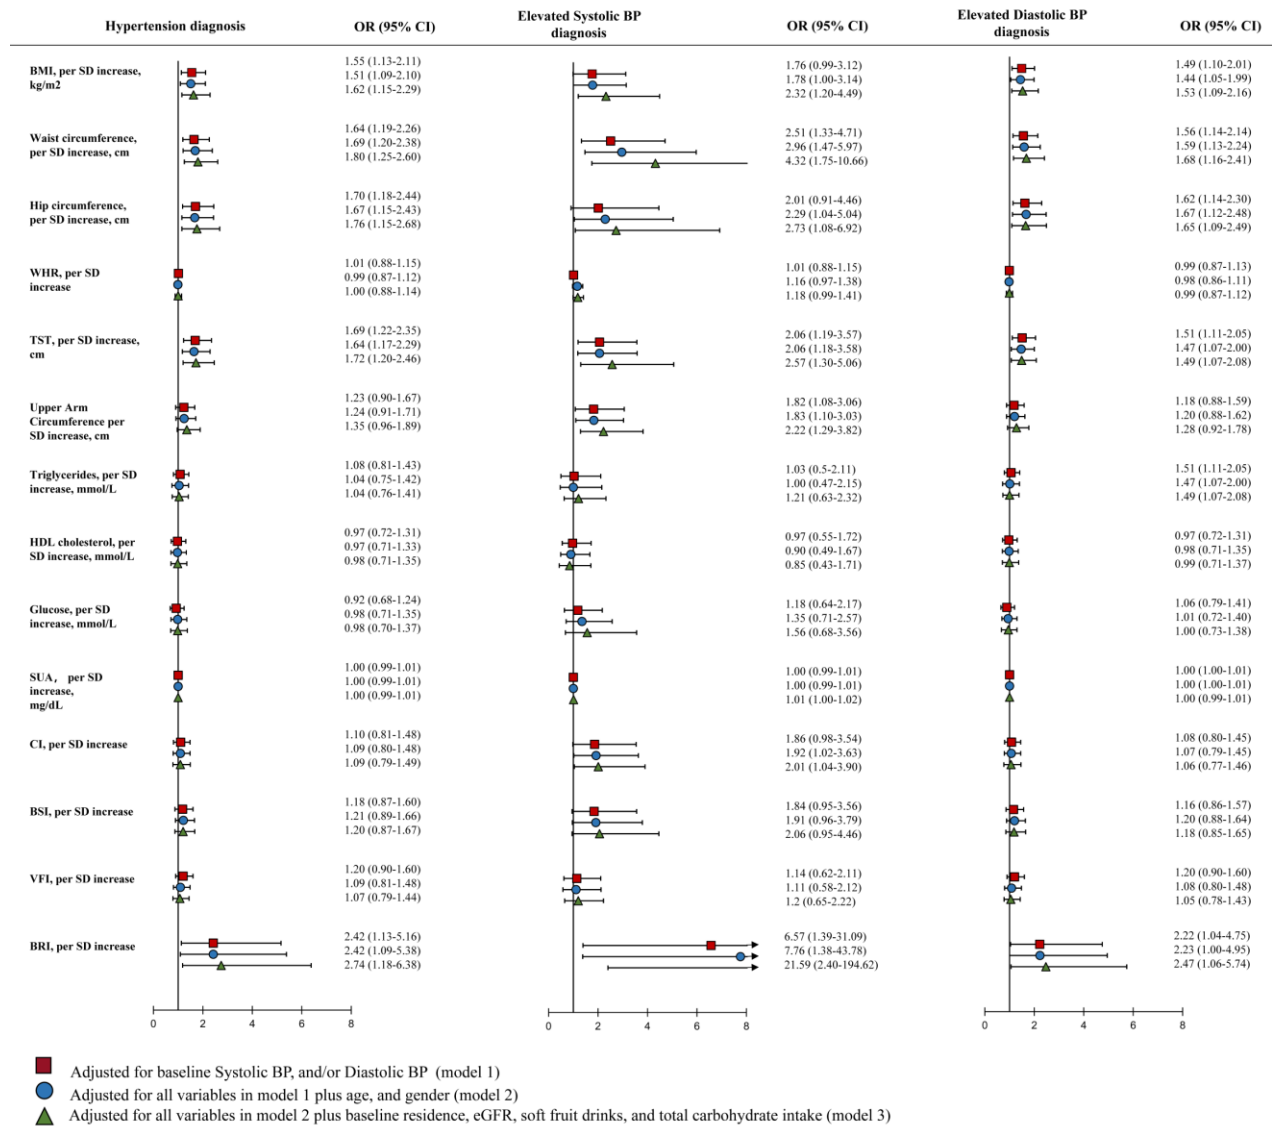

6

7 **Figure 1** Associations between anthropometric indices/metabolic measures and hypertension

8 diagnosis (Abbreviations: BMI, body mass index; BRI, body roundness index; CI, conicity index;

9 TST, triceps skinfold thickness; WHR, waist-to-hip ratio. \* 0.01<P≤0.05; \*\* 0.001<P≤0.01; \*\*\*

10 P<0.001)

11

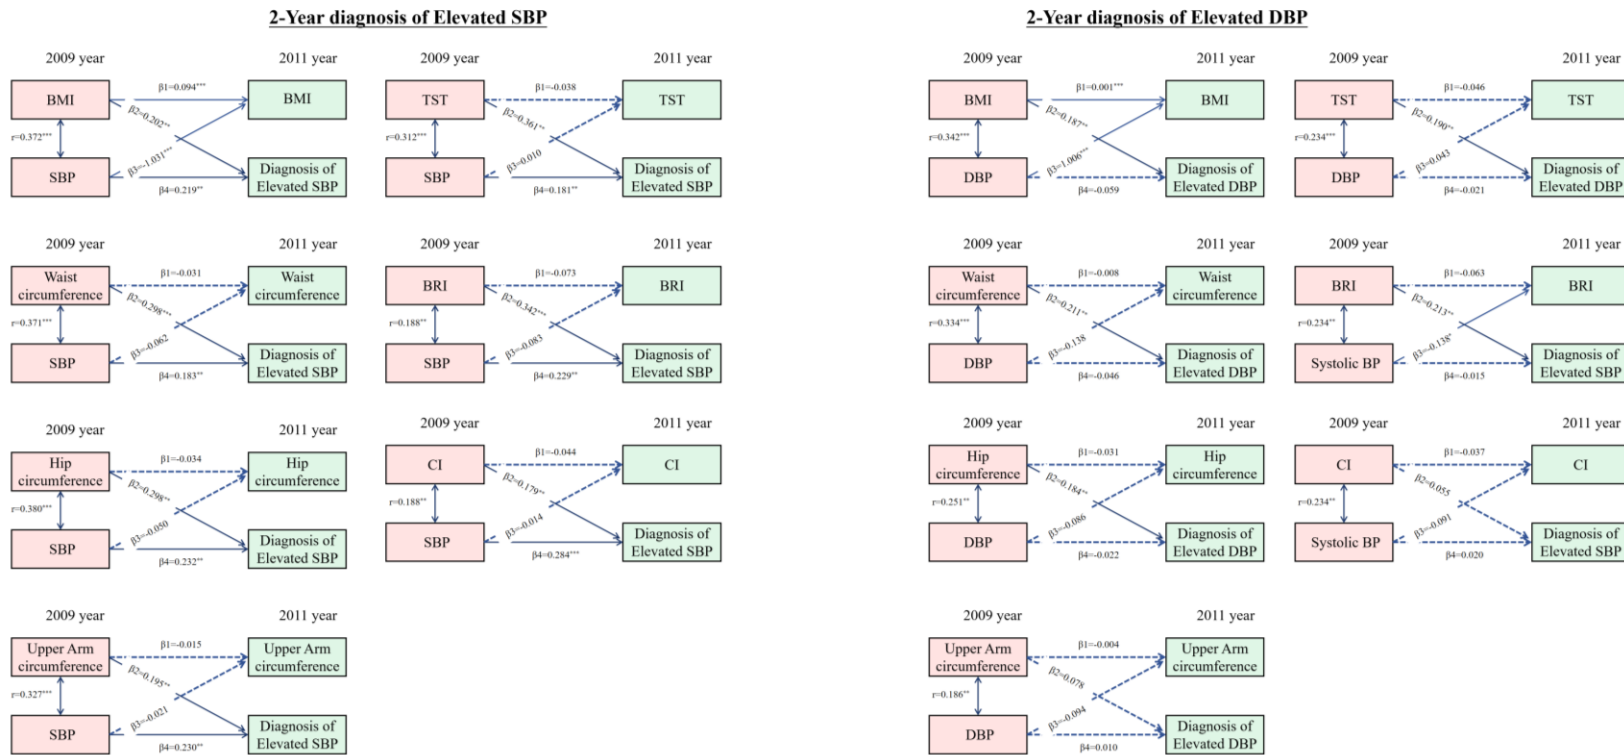

12

13 **Figure 2** Estimates from the cross-lagged model for the associations between anthropometry parameters and incident hypertension classified by  
 14 elevated SBP and elevated DBP (Abbreviations: BMI, body mass index; BRI, body roundness index; CI, conicity index; eGFR, estimated glomerular  
 15 filtration rate; TST, triceps skinfold thickness. All estimates were standardized. \* 0.01<P≤0.05; \*\* 0.001<P≤0.01; \*\*\* P<0.001).

## 16 **Acknowledgements**

17 The authors thank the CHNS team for their hard work and unselfish sharing of survey data. This  
18 research uses data from China Health and Nutrition Survey (CHNS). We are grateful to research  
19 grant funding from the National Institute for Health (NIH), the Eunice Kennedy Shriver National  
20 Institute of Child Health and Human Development (NICHD) for R01 HD30880, National Institute  
21 on Aging (NIA) for R01 AG065357, National Institute of Diabetes and Digestive and Kidney  
22 Diseases (NIDDK) for R01DK104371 and R01HL108427, the NIH Fogarty grant D43TW009077  
23 since 1989, and the China-Japan Friendship Hospital, Ministry of Health for support for CHNS  
24 2009, Chinese National Human Genome Center at Shanghai since 2009, and Beijing Municipal  
25 Center for Disease Prevention and Control since 2011.

## 26 **Abbreviation**

27 AUC, Area Under Curve; BMI, Body Mass Index; BP, Blood Pressure; BRI, Body Roundness Index;  
28 BSI, Body Shape Index; CHNS, China Health and Nutrition Survey; CI, Conicity Index; CMRFs,  
29 Clustered Cardio-metabolic Risk Factors; CVD, Cardiovascular Disease; eGFR, estimated  
30 glomerular filtration rate; HC, Hip Circumference; HDL-C, High-density Lipoprotein Cholesterol;  
31 IDI, Integrated Discrimination Improvement; IQR, Interquartile Range; NRI, Net Reclassification  
32 Improvement; SD, Standard Deviation; SUA, Serum Uric Acid; TG, Triglycerides; TST, Triceps  
33 Skinfold Thickness; VFI, Visceral Fat Index; WC, Waist Circumference; WHR, Waist to Hip  
34 Circumference Ratio.

35 **Funding:** This work was supported by the National Key Research and Development Program of  
36 China (grant numbers 2021YFC2701900, 2021YFC2701901, 2021YFC2701903).

37 **Author contribution:** BZ, SZ, and JF contributed to the conception or design of the work. BZ, HS  
38 and XW contributed to the acquisition, analysis, or interpretation of data for the work. BZ and  
39 RW drafted the manuscript. JY and XG critically revised the manuscript. BZ and TW contribute to  
40 the analysis or interpretation of the work. All gave final approval and agreed to be accountable  
41 for all aspects of work ensuring integrity and accuracy.

42 **Ethical approval:** The China Health and Nutrition Survey (CHNS) was granted approval by the  
43 Institutional Review Board at the University of North Carolina at Chapel Hill, as well as by the  
44 local Institutional Review Board of Ethics Committee. As this study is based on secondary data  
45 analysis of an existing dataset, we did not require additional ethical approval from our  
46 institution. Original data generated and analyzed during this study are included in this  
47 published article or in the data repositories listed in References.

48 **Disclosure summary:** No financial or non-financial benefits have been received or will be received  
49 from any party related directly or indirectly to the subject of this article. The authors have no conflict  
50 of interest to declare.

51 **Data Availability:** Original data generated and analyzed during this study are included in this  
52 published article or in the data repositories listed in References.

53
